# Supplementary material for: Lactiplantibacillus plantarum HY7718 Improves Intestinal Integrity in a DSS-Induced Ulcerative Colitis Mouse Model by Suppressing Inflammation through Modulation of the Gut Microbiota
Source: Int J Mol Sci. 2024 Jan 1;25(1):575. doi: 10.3390/ijms25010575 (PMC10779067; doi:10.3390/ijms25010575)
Supplement: Supplementary file 1 [file ijms-25-00575-s001.zip › ijms-2796861-supplementary.pdf]

# Supplementary Materials: *Lactiplantibacillus plantarum* HY7718 Improves Intestinal Integrity in a DSS-Induced Ulcerative Colitis Mouse Model by Suppressing Inflammation through Modulation of the Gut Microbiota

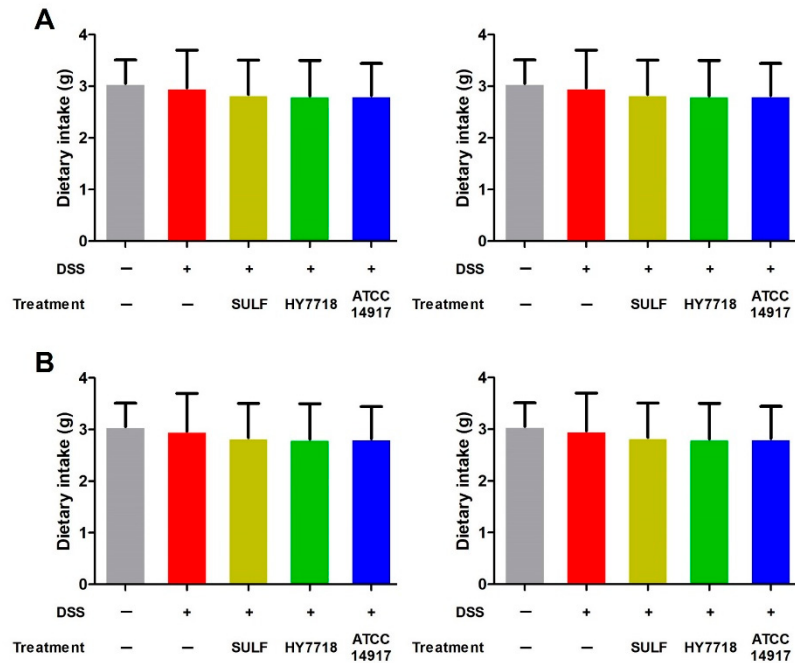

**Figure S1.** Dietary intake and water drinking. (A) Amounts of dietary intake (g) and water drink (mL) during animal experiments, (B) Amounts of dietary intake (g) and water drink (mL) during DSS-drinking period. Results are presented as the mean  $\pm$  SD. DSS, Dextran sulfate sodium; SULF, sulfasalazine; HY7718, *Lactiplantibacillus plantarum* HY7718; ATCC 14917, *Lactiplantibacillus plantarum* ATCC 14917.

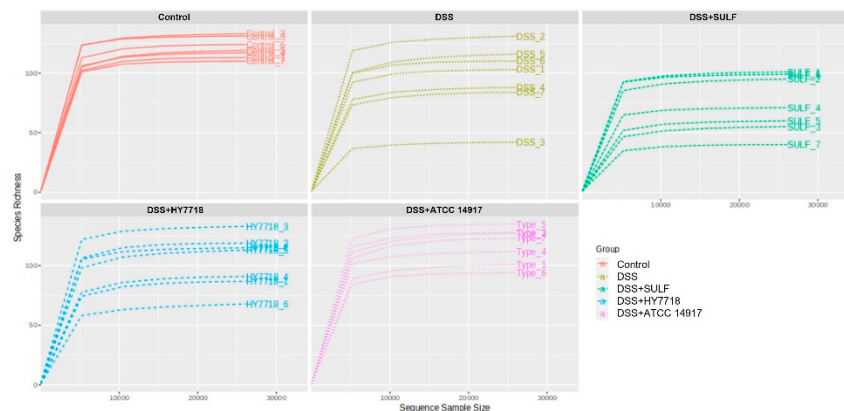

**Figure S2.** Rarefaction curve. DSS, Dextran sulfate sodium; SULF, sulfasalazine; HY7718, *Lactiplantibacillus plantarum* HY7718; ATCC 14917, *Lactiplantibacillus plantarum* ATCC 14917.

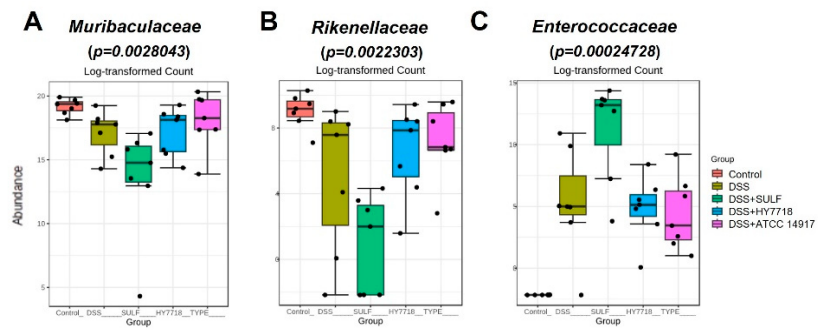

**Figure S3.** Relative abundance of *Muribaculaceae*, *Rikenellaceae* and *Enterococcaceae* in family level. (A) *Muribaculaceae*, (B) *Rikenellaceae* and (C) *Enterococcaceae*. Results are presented as the mean  $\pm$  SD. DSS, Dextran sulfate sodium; SULF, sulfasalazine; HY7718, *Lactiplantibacillus plantarum* HY7718; ATCC 14917, *Lactiplantibacillus plantarum* ATCC 14917.
